# Supplementary material
Source: MDPI journal article supplement (https://www.mdpi.com/search?q=ijms-19-01596)
Supplement: s001 [file ijms-19-01596-s001.pdf]

# Supporting Information

## Tumor Size-Dependent Anticancer Efficacy of Chlorin Derivatives for Photodynamic Therapy

Ji-Eun Chang <sup>a,†</sup>, Yang Liu <sup>c,†</sup>, Tae Heon Lee <sup>c</sup>, Woo Kyoung Lee <sup>c</sup>, Il Yoon <sup>c,\*</sup>, Kwhanmien Kim <sup>a,b,\*</sup>

<sup>a</sup> Department of Thoracic and Cardiovascular Surgery, Seoul National University Bundang Hospital, Seongnam-si, Gyeonggi-do, Republic of Korea

<sup>b</sup> Department of Thoracic and Cardiovascular Surgery, Seoul National University College of Medicine, Seoul, Republic of Korea

<sup>c</sup> Nano Manufacturing Institute, School of Nanoscience and Engineering, Inje University, Gimhae, Republic of Korea

\* Correspondence: [kmkim0070@snuh.org](mailto:kmkim0070@snuh.org) Tel: +82 31 787 7131; Fax: +82 31 787 4050 (K. Kim); [yooni171@inje.ac.kr](mailto:yooni171@inje.ac.kr); Tel: +82 55 320 3871; Fax: +82 55 321 7034 (I. Yoon)

† These two authors contributed equally to this work.

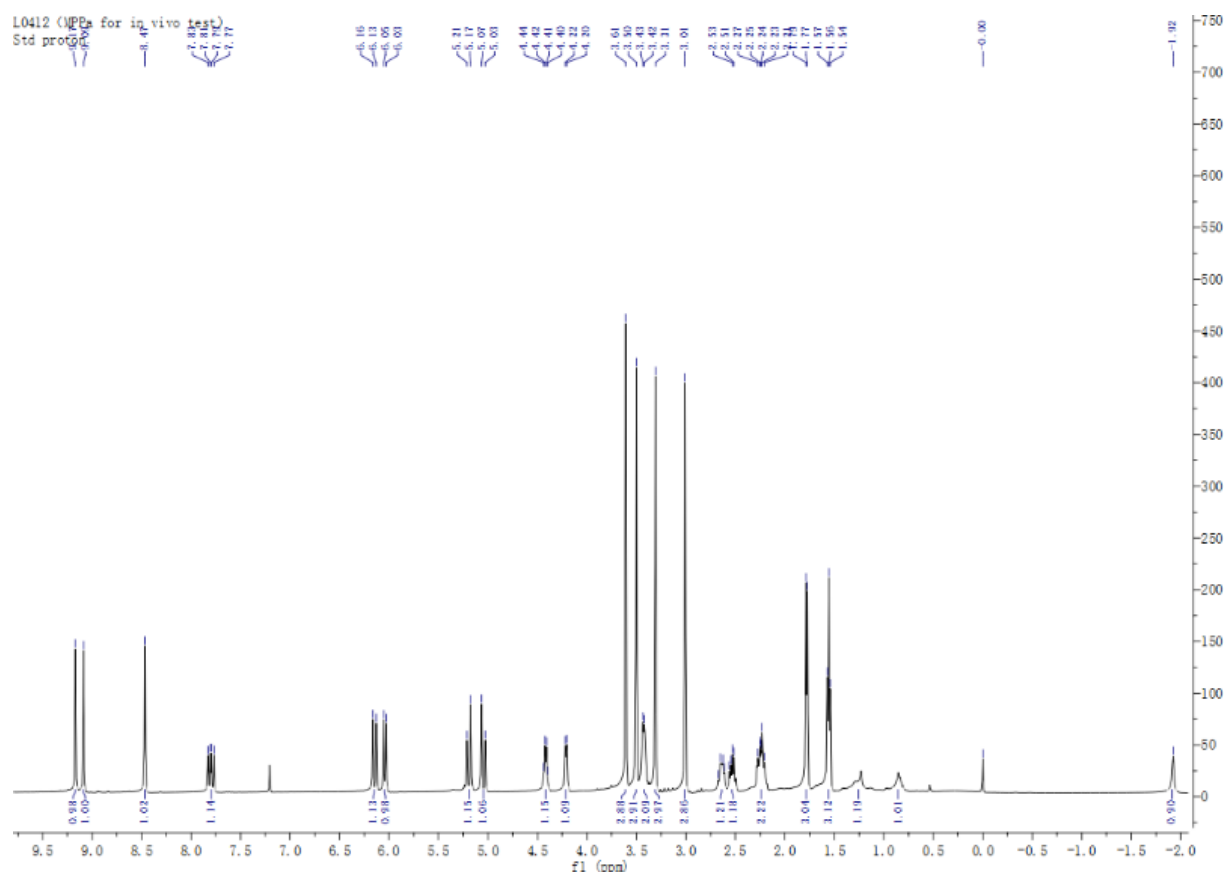

**Figure S1.** <sup>1</sup>H NMR spectrum of MPPa (298 K, CDCl<sub>3</sub>).

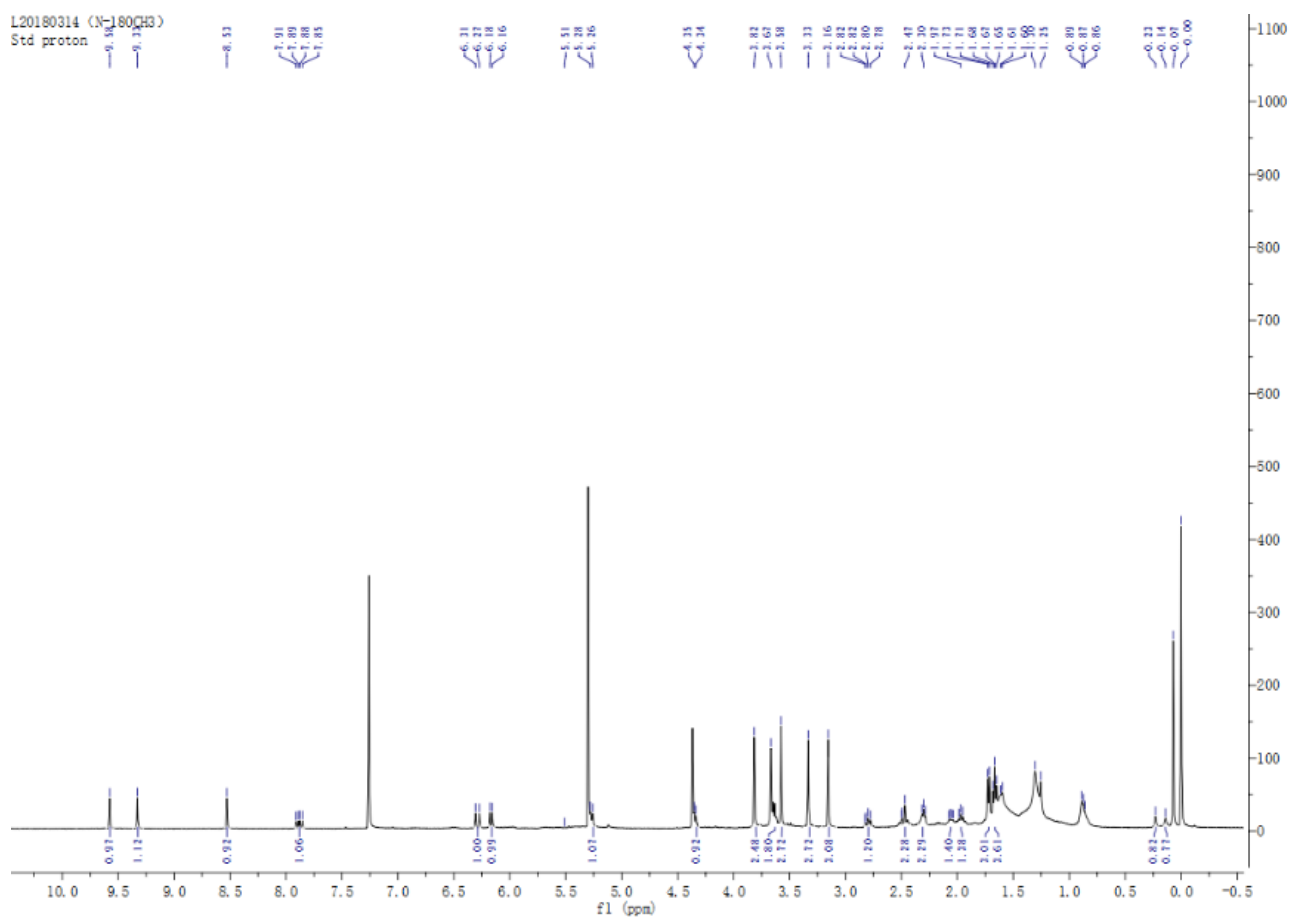

**Figure S2.**  $^1\text{H}$  NMR spectrum of NMPi (298 K,  $\text{CDCl}_3$ ).

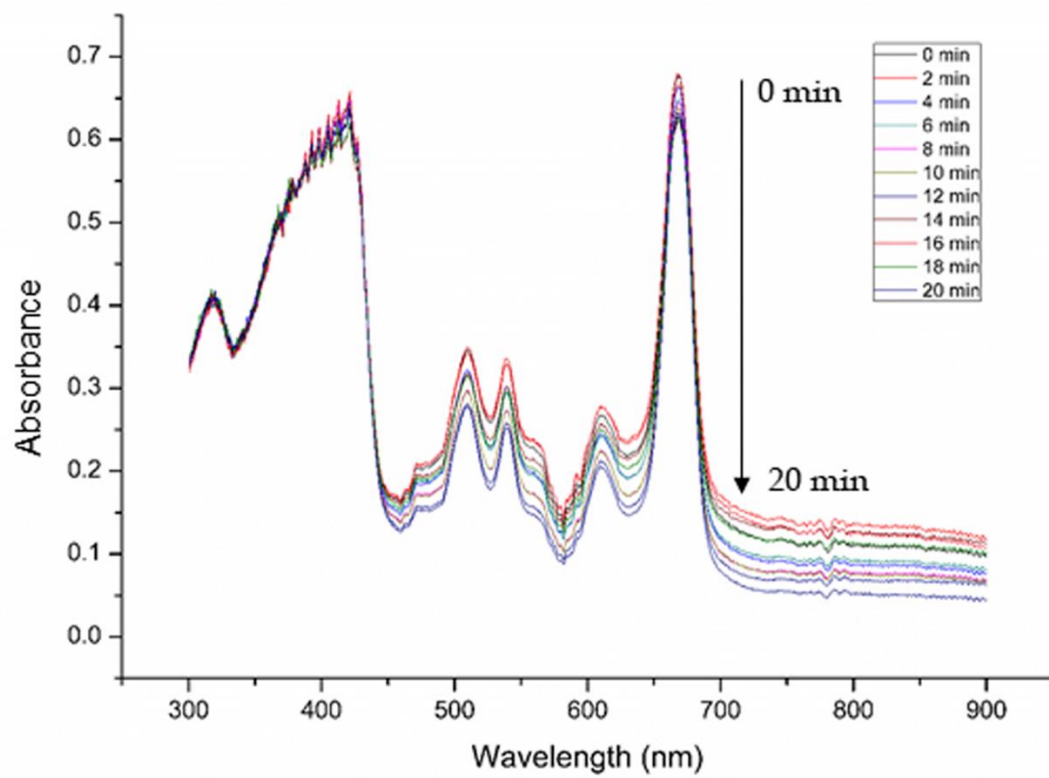

**Figure S3.** UV-Vis spectra for photobleaching of MPPa in CH<sub>2</sub>Cl<sub>2</sub>.

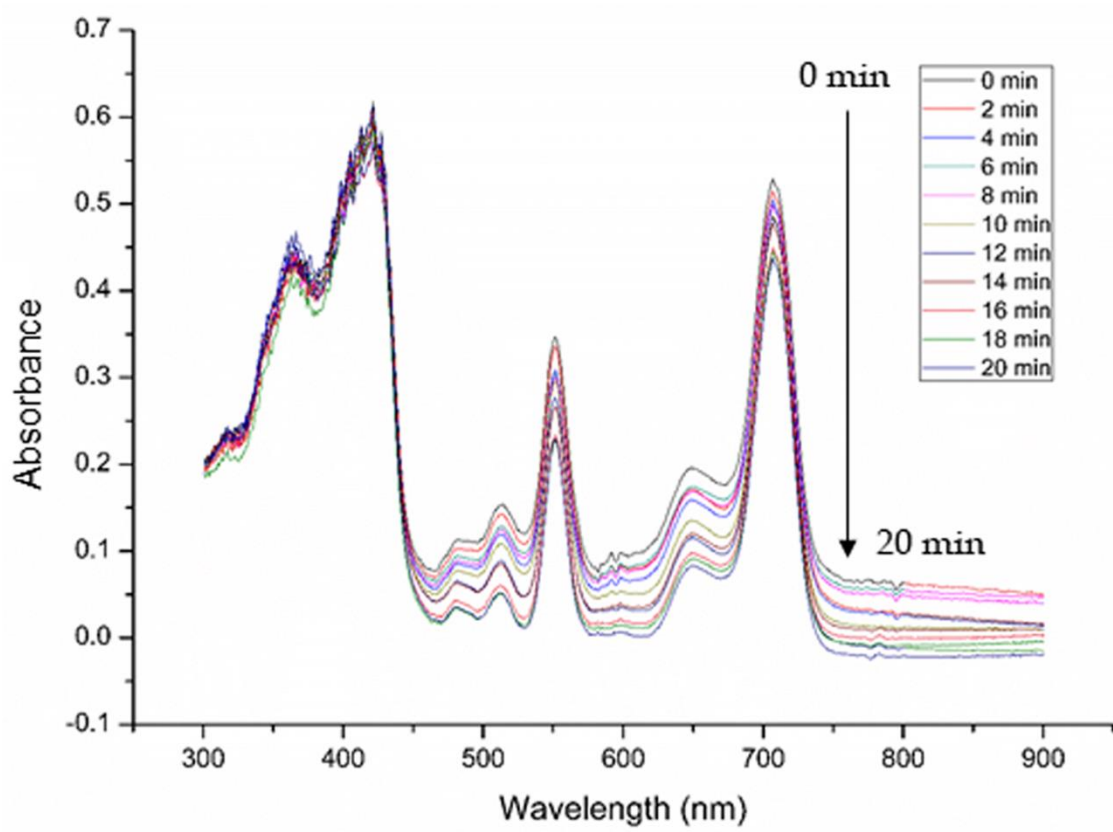

**Figure S4.** UV-Vis spectra for photobleaching of NMPi in CH<sub>2</sub>Cl<sub>2</sub>.

**Table S1.** Cell viability (%) of A549 cell only (control), MPPa and NMPi for photocytotoxicity against A549 cell lines at concentration range of 0.05–20.00  $\mu\text{M}$ . The concentration of all compounds was 50 to 20000 nM. The percentage of cell viability was conducted by MTT assay at 3 h and 24 h incubation times after irradiation. Error values represent the standard deviation of three replicate experiments.

| <b>Concentration<br/>(<math>\mu\text{M}</math>)</b> | <b>MPPa</b>       |                   | <b>NMPi</b>      |                   |
|-----------------------------------------------------|-------------------|-------------------|------------------|-------------------|
| <b>Incubation time</b>                              | <b>3 h</b>        | <b>24 h</b>       | <b>3 h</b>       | <b>24 h</b>       |
| <b>control</b>                                      | 100 $\pm$ 5.77    | 100 $\pm$ 1.20    | 100 $\pm$ 5.77   | 100 $\pm$ 1.20    |
| <b>0.05</b>                                         | 102.50 $\pm$ 5.55 | 107.59 $\pm$ 3.37 | 98.54 $\pm$ 4.62 | 102.83 $\pm$ 0.25 |
| <b>0.10</b>                                         | 97.77 $\pm$ 4.14  | 103.71 $\pm$ 7.93 | 99.64 $\pm$ 2.00 | 98.21 $\pm$ 1.30  |
| <b>0.25</b>                                         | 102.48 $\pm$ 3.39 | 91.01 $\pm$ 9.46  | 98.79 $\pm$ 3.75 | 102.89 $\pm$ 5.75 |
| <b>0.50</b>                                         | 99.71 $\pm$ 4.74  | 31.14 $\pm$ 13.13 | 97.79 $\pm$ 3.37 | 89.02 $\pm$ 2.03  |
| <b>1.00</b>                                         | 27.11 $\pm$ 3.53  | 4.47 $\pm$ 3.29   | 60.06 $\pm$ 6.44 | 13.89 $\pm$ 4.01  |
| <b>2.50</b>                                         | 1.34 $\pm$ 1.53   | 1.95 $\pm$ 1.02   | 3.30 $\pm$ 0.60  | 2.07 $\pm$ 0.80   |
| <b>5.00</b>                                         | 2.34 $\pm$ 0.72   | 2.46 $\pm$ 1.33   | 1.81 $\pm$ 1.40  | 1.66 $\pm$ 0.30   |
| <b>10.00</b>                                        | 1.32 $\pm$ 1.19   | 1.11 $\pm$ 1.05   | 1.28 $\pm$ 0.78  | 1.40 $\pm$ 1.00   |
| <b>20.00</b>                                        | 0.05 $\pm$ 1.27   | 0.16 $\pm$ 1.40   | 0.16 $\pm$ 0.34  | 0.93 $\pm$ 1.60   |

**Table S2.** Cell viability (%) of A549 cell only (control; **con**), MPPa and NMPi for dark toxicity against A549 cell lines at concentration range of 0.05–20.00  $\mu\text{M}$ . The percentage of cell viability was conducted by MTT assay at 3 h and 24 h incubation times after irradiation. Error values represent the standard deviation of three replicate experiments.

| <b>Concentration<br/>(<math>\mu\text{M}</math>)</b> | <b>MPPa</b>       |                    | <b>NMPi</b>       |                   |
|-----------------------------------------------------|-------------------|--------------------|-------------------|-------------------|
|                                                     | <b>3 h</b>        | <b>24 h</b>        | <b>3 h</b>        | <b>24 h</b>       |
| <b>control</b>                                      | 100 $\pm$ 6.45    | 100 $\pm$ 5.05     | 100 $\pm$ 6.45    | 100 $\pm$ 5.05    |
| <b>0.05</b>                                         | 107.98 $\pm$ 5.49 | 106.64 $\pm$ 3.68  | 103.19 $\pm$ 5.00 | 102.43 $\pm$ 3.16 |
| <b>0.10</b>                                         | 109.29 $\pm$ 1.70 | 110.31 $\pm$ 7.30  | 107.01 $\pm$ 3.17 | 110.50 $\pm$ 7.85 |
| <b>0.25</b>                                         | 110.69 $\pm$ 4.08 | 114.29 $\pm$ 10.26 | 108.73 $\pm$ 4.00 | 111.86 $\pm$ 2.25 |
| <b>0.50</b>                                         | 108.93 $\pm$ 5.35 | 112.38 $\pm$ 7.10  | 109.21 $\pm$ 4.44 | 105.81 $\pm$ 2.40 |
| <b>1.00</b>                                         | 108.34 $\pm$ 2.68 | 110.77 $\pm$ 5.33  | 109.53 $\pm$ 4.09 | 109.31 $\pm$ 6.68 |
| <b>2.50</b>                                         | 103.45 $\pm$ 4.30 | 110.40 $\pm$ 3.84  | 109.01 $\pm$ 4.16 | 105.64 $\pm$ 5.92 |
| <b>5.00</b>                                         | 100.97 $\pm$ 6.58 | 104.61 $\pm$ 4.20  | 106.04 $\pm$ 2.02 | 106.73 $\pm$ 1.77 |
| <b>10.00</b>                                        | 98.20 $\pm$ 6.72  | 103.10 $\pm$ 5.35  | 104.34 $\pm$ 1.33 | 104.66 $\pm$ 3.91 |
| <b>20.00</b>                                        | 86.68 $\pm$ 9.71  | 91.06 $\pm$ 2.90   | 95.31 $\pm$ 2.87  | 90.52 $\pm$ 7.95  |
